# Supplementary material
Source: PubMed Central journal article supplement (PMC6145762)
Supplement: jamaneurol-75-850-s001.pdf [file jamaneurol-75-850-s001.pdf]

## Supplementary Online Content

Shoamanesh A, Morotti A, Romero JM, et al; Antihypertensive Treatment of Acute Cerebral Hemorrhage 2 (ATACH-2) and Neurological Emergencies Treatment Trials (NETT) Network Investigators. Cerebral microbleeds and the effect of intensive blood pressure reduction on hematoma expansion and functional outcomes: a secondary analysis of the ATACH-2 randomized clinical trial. *JAMA Neurol*. Published online April 16, 2018. doi:10.1001/jamaneurol.2018.0454

**eAppendix.** Supplemental Appendix

**eFigure.** Flow Diagram of the ATACH-II Trial

**eTable.** Comparison of Baseline Characteristics and Neuroimaging Findings for Subjects Included in CMB Analysis and the Rest of the Subjects From ATACH-2

This supplementary material has been provided by the authors to give readers additional information about their work.

## **eAppendix. Supplemental Appendix**

### **1.0 ATACH-2 Investigators**

#### **Trial Coordination Center:**

**Zeenat Qureshi Stroke Research Center, University of Minnesota**

Principal Investigator: Adnan I. Qureshi, MD

Haitham Hussein, MD (Consent and CRF Development); Jill M. Novitzke, MPA, BSN, CCM, CLNC (Monitoring Oversight); Cathie Witzel, BA (Administrative Assistance, Editing); Bo Connelly, JD (Project Manager); Saqib A. Chaudhry, MD (Education Development); Emily I. Abbott, JD, CPA (Grants and Contracts, International Liaison); Erik T. Maland, BAN, RN, PHN (Clinical Research Associate and Monitor); Kathryn A. France, BA, RN, PHN, CCRC, CCRA (Clinical Research Associate, Clinical Trial Nurse-Coordinator, Domestic Affairs and Protocol Liaison, Monitor); Basit Rahim, MD (Clinical Tools Design); Zachariah Miller, MA (Communications Coordinator); Alfredo J. Caceres, MD (Central Imaging Reader); Logan J. Brau, BS (Imaging Technician); Mushtaq H. Qureshi, MD (Central Imaging Analyst); Jessy K. Thomas, MS, CCRP (Project Manager); Mohammad R. Afzal, MD (Assistant to Central Imaging Analyst); Norrita Rech, BS, MA, CCRP (Grants and Contracts)

#### **Statistical and Data Coordination Center:**

**Data Coordination Unit, Department of Public Health Sciences, Medical University of South Carolina**

Principal Investigator: Yuko Y. Palesch, PhD

Renee Martin, PhD; and Wenle Zhao, PhD (Co-Investigators); Lydia Foster, MS; and Jaime Speiser, MS (Biostatistical Programmers); Catherine Dillon, BS (Trials Operations Manager); Jaemyung Kim, MBA (Senior IS Developer); Cassidy Conner, MS; Adam Henry, MPH; Kristina Hill, MPH, MIS (Data Managers); Kristen Clasen, MEd (Regulatory Documents Manager); Christy Cassarly (Graduate Research Assistant)

#### **Independent Oversight Committee**

**Johns Hopkins University – Division of Brain Injury Outcomes**

Daniel F. Hanley, MD (Chair); Carlos S. Kase, MD; and J. Ricardo Carhuapoma, MD (Committee Members); Nichol McBee, MPH, CCRP (IOC Coordinator)

**National Institute of Neurological Disorders and Stroke of the National Institutes of Health NINDS Representatives:**

Claudia Moy, PhD (Project Scientist); and Scott Janis, PhD (Program Official)

**NINDS-Appointed Data and Safety Monitoring Board:**

J. Claude Hemphill III, MD, MAS (Chair); Brian L. Hoh, MD, FACS, FAHA; Mario Zucharello, MD; and Michael K. Parides, PhD (Board Members)

## **Regional/National Clinical Coordinating Centers**

### **United States:**

#### **The Neurological Emergency Treatment Trials (NETT) Network, University of Michigan**

William Barsan, MD (NETT Network Principal Investigator); Robert Silbergleit, MD (NETT Network Co-Investigator); Joshua N. Goldstein, MD, PhD (Investigator); Valerie Stevenson, BAS, LRT, CCRP (Administrative Director); Erin Bengelink, MS (Site Manager); Joy Black, BSN, MS (Education Coordinator); Mickie Speers, BSN; Donna Harsh, MS; Carol Van Huysen, BS; Angela Caveney, PhD; and Andrace Deyampert, MSHS (Monitors); Beth Grundman and Allison DuRoss (Research Assistants). Additional NETT hub participants: Jan Claassen, MD (Columbia); Michelle Biros, MD (University of Minnesota); David Wright, MD (Emory University); James Quinn, MD; and Rosen Mann (Stanford University); Jill Baren, MD (University of Pennsylvania); Robert Welch, MD (Wayne State University); Tom Aufderheide, MD; Melissa Mena; and Erica Chopskie (Medical College of Wisconsin); Roger Humphries, MD (University of Kentucky); Monica Mendoza-Moore (University of Texas); Katherine Lamond (University of Pennsylvania); Ryan Callahan and Melissa Howell, (Massachusetts General Hospital); Patricia M. McNelis and Hannah Reimer (Temple University); Ginny Stasinski and Bruce Barnhart (University of Arizona); Ryan McCormick (UCSF); Ana Maria Gomez Ramirez (Ohio State University).

#### **Neurocritical Care Research Network (NCRN)**

Jose I. Suarez (Principal investigator)

### **Japan:**

#### **National Cerebral and Cardiovascular Center and Japan Cardiovascular Research Foundation**

Kazunori Toyoda, MD, PhD (Lead National Principal Investigator); Haruko Yamamoto, MD PhD (Lead Project Manager); Masatoshi Koga, MD PhD, Shoichiro Sato, MD PhD, and Sohei Yoshimura, MD PhD (coordination for Japanese sites); Mayumi Fukuda-Doi, MD MPH (Regulatory Manager); Kanae Hirase RN, CCRC (Lead Monitor); Shuhei Okazaki, MD PhD (Monitor); Hiromi Ohara, RN, CCRC (Coordinator)

### **China:**

#### **Beijing Tiantan Hospital Clinical Coordinating Center**

Yongjun Wang, MD, PhD (Lead National Principal Investigator); Zeyu Ding, MD, PhD (Lead Coordinator); Dandan Wang, MD (Regulatory Specialist); Nannan Xu (Clinical Research Associate)

### **Taiwan:**

#### **China Medical University Hospital Clinical Trial Center of Excellence**

Prof. Chung Y. Hsu, MD, PhD (Lead National Principal Investigator); Dana Lin (Lead Coordinator); Mamiko Suzuki (Lead Monitor); Chin-Ting Hsu, Jou-Ping Hsu, and Emma Ho, MS, BSN (Monitors)

### **Germany:**

#### **Coordinating Center for Clinical Trials (KKS), University Hospital Heidelberg**

Prof. Dr. Thorsten Steiner, MD (Lead National Principal Investigator); Andrea Seidel-Glätzer, MA, RN (Project Manager); Claudia Simonis, PhD (Clinical Research Associate), Ulrike Berlet, Pharmacist (Clinical Research Associate)

### **South Korea:**

## **Clinical Sites and Site Investigators, by Enrollment**

### **National Cerebral and Cardiovascular Center, Osaka, Japan (79)**

Kazunori Toyoda, MD, PhD (Principal Investigator); Kazuyuki Nagatsuka, MD, PhD (Investigator); Kanae Hirase, RN, CCRC (Primary Coordinator)

### **Beijing Tiantan Hospital, Beijing, China (72)**

Yongjun Wang, MD, PhD (Principal Investigator); Zeyu Ding, MD, PhD (Primary Coordinator)

### **Kobe City Medical Center General Hospital, Kobe City, Hyogo, Japan (53)**

Nobuyuki Sakai, MD, DMSc (Principal Investigator); Kenichi Todo, MD, PhD (Investigator); Sakina Yoshihira (Primary Coordinator)

### **Toranomon Hospital, Tokyo, Japan (38)**

Takayuki Hara, MD (Principal Investigator); Mihoko Matsukami (Primary Coordinator)

**Taizhou First People's Hospital, Taizhou City, Zhejiang Province, China (37)** Zhimin Wang, MD (Principal Investigator); Jie Chen, MD (Primary Coordinator)

### **National Taiwan University Hospital, Taipei, Taiwan (36)**

Giann-Shing Jeng, MD, PhD (Principal Investigator); Sung-Chun Tang, MD, PhD; Li-Kai Tsai, MD, PhD; and Shin-Joe Yeh, MD (Co-Principal Investigators); Yu-Ting Wang (Primary Coordinator)

### **Columbia University Medical Center, New York, NY, USA (27)**

Sachin Agarwal, MD, MPH (Principal Investigator); Stephan A. Mayer, MD (Principal Investigator, former, currently Director, Institute for Critical Care Medicine - Icahn School of Medicine at Mount Sinai); M. Cristina Faló, PhD; and Angela Velazquez, MD (Primary Coordinators)

### **St. Cloud Hospital, St. Cloud, MN, USA (26)**

M Fareed K Suri, MD (Principal Investigator); Melissa A. Freese, BSN, RN, CNRN (Primary Coordinator)

### **Abington Memorial Hospital, Abington, PA, USA (23)**

Qaisar A. Shah, MD (Principal Investigator); Karin Jonczak, CRNP; and Patricia Businger, CRNP (Primary Coordinators)

### **Baylor College of Medicine, Houston, TX, USA (20)**

Jose I. Suarez, MD; and Paulina B. Sergot, MD (Principal Investigators); Eusebia Calvillo, RN; and Kelly Rogers Keene, BSN, RN (Primary Coordinators)

### **Stroke & Neurovascular Center, JFK Medical Center, Edison, NJ, USA (18)**

Jawad F. Kirmani, MD (Principal Investigator); Spozhmy Panezai, MD (Co-Principal Investigator); Charles Porbeni, MD; Nnamdi Uhegwu, MD; and Briana DeCarvalho, MSN, RN (Primary Coordinators)

### **Kaohsiung Veterans General Hospital, Kaohsiung, Taiwan (18)**

Ching-Huang Lin, MD; and Yuk-Keung Lo, MD (Principal Investigators); Yi-Ting Hsu (Primary Coordinator)

### **Guilford Neurologic Associates, Greensboro, NC, USA (16)**

Pramod Sethi, MD (Principal Investigator); Rizwan Sabir and Wesley Harbison, RN, MHA (Primary Coordinators)

**Kyorin University**, Tokyo, Japan (16)

Yoshiaki Shiokawa, MD, PhD (Principal Investigator); Masataka Torii MD, PhD (Primary Coordinator)

**St. Marianna University Hospital**, Kawasaki, Kanagawa, Japan (16)

Yasuhiro Hasegawa, MD, PhD (Principal Investigator); Yuki Ohta, PhD; and Sachiko Takenoshita, PhD (Primary Coordinators)

**China Medical University Hospital**, Taichung, Taiwan (16)

Chun-Lin Liu, MD (Principal Investigator); Li-Te Tseng (Primary Coordinator)

**Hennepin County Medical Center**, Minneapolis, MN, USA (14)

Thomas A. Bergman, MD (Principal Investigator); Gustavo J. Rodriguez, MD (Principal Investigator, former, Currently at Texas Tech University Health Sciences Center of El Paso, TX); Kathryn France, BA, RN, PHN, CCRC, CCRA (Primary Coordinator); and Kathleen Miller, BSN CCRC (Primary Coordinator, former)

**Gifu University Hospital**, Gifu, Japan (14)

Toru Iwama, MD, PhD (Principal Investigator); Shin-ichi Yoshimura, MD, PhD (Principal Investigator); Yusuke Egashira, MD, PhD; and Toshinori Takagi, MD, PhD (Primary Coordinators)

**University Hospital Heidelberg**, Heidelberg, Germany (14)

Julian Bösel, MD (Principal Investigator); Perdita Beck (Primary Coordinator)

**Department of Neurosurgery, Nakamura Memorial Hospital**, Sapporo, Hokkaido, Japan (13) Kenji

Kamiyama, MD (Principal Investigator); Ryo Fujii and Megumi Chiba (Primary Coordinators)

**Grady Memorial Hospital**, Atlanta, GA, USA (12)

Gustavo Pradilla, MD (Principal Investigator); Alex J. Hall, MS, RN (Primary Coordinator); and Michael P. Lunney, MPH, NRP (Primary Coordinator, former)

**Kansas University Medical Center**, Kansas City, KS, USA (12)

Katherine Palmieri, MD (Principal Investigator); Abhijit Lele, MD (Principal Investigator, former); Rachel Henning, RN, BSN, CCRP (Primary Coordinator); Stephanie Thomas-Dodson and Angie Ballew (Primary Coordinators, former)

**Stanford University**, Stanford, CA, USA (12)

Chitra Venkatasubramanian, MBBS, MD, MSc (Principal Investigator); Christine Wijman, MD (Principal Investigator, initial, in memory of); Rosita Thiessen, BA, CCRP (Primary Coordinator); Madelleine Garcia and Ami Okada, PhD (Primary Coordinators, former)

**Tokyo Saiseikai Central Hospital**, Tokyo, Japan (12)

Haruhiko Hoshino, MD (Principal Investigator); Chiaki Arakawa (Primary Coordinator)

**Wuhan Brain Hospital**, Wuhan, China (12)

Yuhua Chen, MD (Principal Investigator); Jin Li, MD (Primary Coordinator)

**Memorial Hermann - Texas Medical Center**, Houston, TX, USA (11)

Tiffany R. Chang, MD (Principal Investigator); Misty Ottman (Primary Coordinator)

**Valley Baptist Medical Center**, Harlingen, TX, USA (11)

Ameer E. Hassan, DO (Principal Investigator); Olive Sanchez, MSN, RN, BC (Primary Coordinator)

**Kohnan Hospital**, Sendai, Miyagi, Japan (11)  
Eisuke Furui, MD (Principal Investigator); Aki Osanai (Primary Coordinator)

**Shin-Kong Wu Ho-Su Memorial Hospital**, Taipei, Taiwan (11)  
Li-Ming Lien, MD, PhD (Principal Investigator); Hsu-Ling Yeh, MD (Investigator); I-Yu Lee (Primary Coordinator)

**Seoul National University Hospital**, Seoul, South Korea (11)  
Byung-Woo Yoon, MD, PhD (Principal Investigator); Yeo-Jung Chae, and Jae-Young Jo, RN (Primary Coordinators)

**UAB Comprehensive Stroke Center**, Birmingham, AL, USA (10)  
Angela N. Hays, MD (Principal Investigator); Andrei V. Alexandrov, MD (Principal Investigator, former, now Semmes Murphy Professor and Chair, Department of Neurology, University of Tennessee Health Science Center); April Sisson, BSN, RN (Primary Coordinator); and Lynn Merritt, RN (Primary Coordinator, former)

**Massachusetts General Hospital**, Boston, MA, USA (10)  
Joshua N. Goldstein, MD, PhD (Principal Investigator); Gregory Tirrell, MS (Primary Coordinator); Abigail Cohen, Kristen McNamara, and Lauren Barton (Primary Coordinators, former)

**St. Marianna University Tokoyo Hospital**, Kawasaki, Kanagawa, Japan (10) Toshihiro Ueda, MD (Principal Investigator); Yoko Kaji (Primary Coordinator)

**National Hospital Organization Kyushu Medical Center**, Fukuoka, Japan (10)  
Yasushi Okada, MD, PhD (Principal Investigator); Asako Nakamura, MD, PhD; and Kouichirou Maeda (Primary Coordinators)

**Datong Third People's Hospital**, Datong, Shanxi Province, China (10) Xudong Ren, MD (Principal Investigator); Kang Ye (Primary Coordinator)

**University of Bonn**, Bonn, Germany (10)  
Hartmut Vatter, MD (Principal Investigator); Erdem Güresir, MD (Investigator); Azize Boströem, MD (Investigator, Primary Coordinator)

**Ochsner Clinic Foundation**, New Orleans, LA, USA (9)  
Ifeanyi Iwuchukwu, MD (Principal Investigator); Arash Afshinnik, MD; and Kenneth Gaines, MD (Principal Investigators, former); William Itoua Nganongo (Primary Coordinator)

**Temple University Hospital**, Philadelphia, PA, USA (9)  
Nina T. Gentile, MD (Principal Investigator); Vernon S. Kalugdan, BSN, RN; and Brent Freeman (Primary Coordinators)

**Novant Health Research Institute – Novant Health Forsyth Medical Center**, Winston-Salem, NC, USA (9)  
Benjamin Anyanwu, MD (Principal Investigator); and Chere Chase-Gregory, MD, MHS (Principal Investigator, former); Kevin Colston, LPN, CRC (Primary Coordinator)

**Henry Ford Hospital**, Detroit, MI, USA (9)  
Christopher Lewandowski, MD (Principal Investigator); Joseph B. Miller, MD, MS (Investigator); Shannen Berry-Hymon, RN (Primary Coordinator); Kathleen Mays-Wilson, MS, BSN, RN, CCRP; and Anne Marie Lundell, BSN, RN (Primary Coordinators, former)

**University of Pennsylvania**, Philadelphia, PA, USA (8)

Steven Messe, MD (Principal Investigator); Nichole Gallatti, MEd (Primary Coordinator)

**National Hospital Organization Nagoya Medical Center**, Nagoya City, Aichi, Japan (8) Satoshi Okuda, MD (Principal Investigator); Kazumi Nakamura (Primary Coordinator)

**University Hospitals Case Medical Center**, Cleveland, OH, USA (7)

Nicholas Bambakidis, MD (Principal Investigator); Valerie Cwiklinski (Primary Coordinator)

**Lehigh Valley Hospital**, Allentown, PA, USA (7)

Hermann Christian Schumacher, MD (Principal Investigator, currently Neurohospitalist at Capital Health, NJ); Kathy Knapp, Susan Nabhan, and Leighanne Hartman (Primary Coordinators)

**Keio University Hospital**, Tokyo, Japan (7)

Yoshiaki Itoh, MD, PhD; Takato Abe, MD, PhD; and Shinichi Takahashi, MD, PhD (Principal Investigators); Mao Okamoto (Primary Coordinator)

**National Cheng Kung University Hospital**, Tainan, Taiwan (7)

Chih-Hung Chen, MD (Principal Investigator); Ya-Fang Hsueh (Primary Coordinator)

**Advocate Christ Medical Center**, Oak Lawn, IL, USA (6)

Erik Kulstad, MD (Principal Investigator); Michael T. Stanek, MD (Co-Principal Investigator); Kathleen Hesse, RN, CCRC (Primary Coordinator)

**King's County Medical Center**, New York, NY, USA (6)

Susan W. Law, DO (Principal Investigator); Helen Valsamis, MD (Principal Investigator, former); Steven R. Levine, MD (Investigator); Bryce Petty, CCRC (Primary Coordinator); Sarah Z. Weingast, Saroj D. Kunnakkat, Bruhati Shah, and Vanessa Arnedo (Primary Coordinators, former)

**Baotou Central Hospital**, Baotou, China (6)

Yuechun Li, MD (Principal Investigator); Qiang Chen (Primary Coordinator)

**Seoul National University Bundang Hospital**, Seongnam, Gyeonggi-do, South Korea (6)

Hee-Joon Bae, MD, PhD (Principal Investigator); Joungsim Kim (Primary Coordinator); Juri Park, RN (Coordinator)

**Regions Hospital**, St. Paul, MN, USA (5)

Michael D. Zwank, MD (Principal Investigator); Tenbit Emiru, MD, PhD (Principal Investigator, former, currently at Hennepin County Medical Center, Minneapolis, MN); Emily Mischel, MA (Primary Coordinator); and Sandi Wewerka, MPH (Primary Coordinator, former)

**University of California San Diego**, San Diego, CA, USA (5)

Dawn Meyer, FNP-C, PhD (Principal Investigator); Karen Rapp, BSN, RN, CCRC (Primary Coordinator); Nancy Kelly, Ronelyn Chavez, and Teresa Rzesiewicz (Primary Coordinators, former)

**Palmetto Health Richland and University of South Carolina**, Columbia, SC, USA (5)

Souvik Sen, MD (Principal Investigator); Evelyn Kennedy, MSN, RN, CCRP (Primary Coordinator); Krista Vaughan, RNC; and Selena Lollar, RN (Primary Coordinators, former)

**St. Joseph's Regional Medical Center**, Paterson, NJ, USA (5)

Dorothea Altschul, MD (Principal Investigator); Avery Katz, MD (Principal Investigator, former); Bogdana Dikovytska, CCRC (Primary Coordinator); and Milicent Titus, CCRP (Primary Coordinator, former)

**Martin-Luther University Hospital Halle-Wittenberg**, Halle (Saale), Germany (5)

Katja E. Wartenberg, MD, PhD (Principal Investigator); Doreen Herale (Primary Coordinator); and Sandra Seidl (Primary Coordinator, former)

**University of Tübingen**, Tübingen, Germany (5)

Sven Poli, MD (Principal Investigator); Ulf Ziemann, Florian Härtig, Martin Ribitsch, Hardy Richter, Matthias Ebner, Alexandra Gaenslen (Investigators); Julia Zeller (Primary Coordinator)

**Tulane Medical Center**, New Orleans, LA, USA (4)

Ramy El Khoury, MD (Principal Investigator), Elizabeth Jones, (Principal Investigator, NETT hub, and site former); Sheryl Martin-Schild, MD, PhD (Investigator); Annie Stell and Cheryl Carmody (Primary Coordinators, former)

**Sinai-Grace Hospital**, Detroit, MI, USA (4)

Gregory M. Norris, MD (Principal Investigator); Valerie Mika (Primary Coordinator)

**Yale - New Haven Hospital**, New Haven, CT, USA (4)

David M. Greer, MD, MA (Principal Investigator); Kimberly Kunze, MSN, RN (Primary Coordinator); Janet R. Halliday, BS, RN (Primary Coordinator, former)

**Mayo Clinic Florida**, Jacksonville, FL, USA (4)

W. David Freeman, MD (Principal Investigator); Emily Edwards, MS, CCRP (Primary Coordinator); Dale Gamble, MHS, CCRP; and Sothear Luke, MPH, CCRP (Primary Coordinators, former)

**Tampa General Hospital/University of South Florida School of Medicine**, Tampa, FL, USA (4)

David Z. Rose, MD (Principal Investigator); Tara McTigue, RN, CCRC (Primary Coordinator)

**University of Louisville, Department of Neurology**, Louisville, KY, USA (4)

Jignesh J. Shah, MD (Principal Investigator); Kerri S. Rimmel, MD, PhD (Principal Investigator, former, now Professor and Chair, Department of Neurology at University of Louisville); Ann Jerde (Primary Coordinator)

**Medical College of Wisconsin**, Milwaukee, WI, USA (4)

Ann Helms, MD (Principal Investigator); Ling Zhong, PhD (Primary Coordinator); Emon Das, (Primary Coordinator, former)

**Colorado Neurological Institute**, Englewood, CO, USA (4)

Ira Chang, MD (Principal Investigator); Alicia Novak, PhD; and Laura Greeley (Primary Coordinators); Paula Fisk, BS, CCRP; Ashley Bittner, BS, CCRP; and Lenden Neeper, BS, CCRP (Primary Coordinators, former)

**Fairview Southdale Hospital**, US (4)

Alexander Y. Zubkov, MD, PhD (Principal Investigator); Abbey Staugaitis, MSN (Primary coordinator); Kathryn France, BA, RN, PHN, CCRC, CCRA ; and Kathleen Miller, BSN, CCRC (Primary Coordinators, former)

**Penn State Milton S. Hershey Medical Center**, Hershey, PA, USA (4)

J. Christopher Zacko, MD (Principal Investigator); Deborah Hoffman, BSN (Primary Coordinator)

**Eastern Idaho Regional Medical Center**, Idaho Falls, ID, USA (4)

Kenneth E. Krell, MD (Principal Investigator); Erich Garland, MD and Douglas N. Whatmore, MD (Investigators); Amy Thornley, ACNP-BC (Primary Coordinator)



**Research Medical Center**, Kansas City, MO, USA (4)  
Iftekhhar Ahmed, MD (Principal Investigator); Sarah Dunalewicz (Coordinator); Jennifer W. Feedback, Amy Akins, Pamela McCann (Primary Coordinators, former)

**Tri-Service General Hospital and the National Defense Medical Center**, Taipei, Taiwan (4) Hsin-I Ma, MD, PhD (Principal Investigator); Pei-Min Hsiao (Primary Coordinator)

**University Medical Center Brackenridge**, Austin, TX, USA (3)  
Jefferson T. Miley, MD (Principal Investigator); Laura Lachance, MA, CCRP (Primary Coordinator)

**Rhode Island Hospital**, Providence, RI, USA (3)  
Lisa H. Merck, MD, MPH (Principal Investigator); Bradford B. Thompson, MD (Co-Principal Investigator); Jena Lerch (Primary Coordinator)

**UPMC Presbyterian Hospital**, Pittsburgh, PA, USA (3)  
Bradley J. Molyneaux, MD, PhD; Clifton W. Callaway, MD, PhD; and Jon C. Rittenberger, MD (Principal Investigators); Sara DiFiore, Pamela Fazio, RN, CNC; and Kara Armbuster, BSN, RN (Primary Coordinators)

**Detroit Receiving Hospital**, Detroit, MI, USA (3)

Greg M. Norris, MD (Principal Investigator); Wazim Mohamed, MD; and Mohammad S Ibrahim, MD (Investigators); Valerie H. Mika, MS; and Amy Spencer (Primary Coordinators); Cathey Boyer (Primary Coordinator, former)

**SUNY Downstate Medical Center/University Hospital of Brooklyn**, Brooklyn, NY, USA (3)  
Steven R. Levine, MD (Principal Investigator); Bryce Petty (Primary Coordinator); Sarah Z. Weingast, Saroj D. Kunnakkat, Bruhati Shah, Marijayne Bushey, and Vanessa Arnedo (Primary Coordinators, former)

**Maine Medical Center**, Portland, ME, USA (3)  
David B. Seder, MD (Principal Investigator); Richard R. Riker, MD (Investigator); Barbara F. McCrum, RN, BSN (Primary Coordinator)

**Sutter Roseville Medical Center**, Roseville, CA, USA (3)  
Asim Mahmood, MD (Principal Investigator); Michele Guillen (Primary Coordinator); Teresa Carter (Primary Coordinator, former)

**University of New Mexico**, Albuquerque, NM, USA (3)  
Huy Tran, MD (Principal Investigator); Marc Malkoff, MD (Principal Investigator, former); Theresa Wussow, BSSN, RN; and Alice Brown, CNP (Primary Coordinators)

**Providence Brain and Spine Institute**, Portland, OR, USA (3)  
Ted Lowenkopf, MD (Principal Investigator); Monica Rodriguez (Primary Coordinator)

**University Hospital Mannheim**, Mannheim, Germany (3)  
Marc Fatar, MD (Principal Investigator); Kathrin Knoll (Primary Coordinator)

**Texas Tech University Health Sciences Center of El Paso**, El Paso, TX, USA (2)  
Gustavo J. Rodriguez, MD (Principal Investigator); Alberto Maud, MD (Co-Principal Investigator); Elizabeth Ledger (Primary Coordinator)

**UCSF Medical Center**, San Francisco, CA, USA (2)  
Wade Smith, MD, PhD (Principal Investigator); Michelle Meeker, BSN, RN (Primary Coordinator)

**University of Kentucky**, Lexington, KY, USA (2)

Luther Creed Pettigrew, MD (Principal Investigator); Linda Dechtenberg and Joann Short, RN BSN (Primary Coordinators)

**Banner University Medical Center - Tucson Campus**, Tucson, AZ, USA (5)

Kurt Denninghoff, MD (Principal Investigator); Chelsea S. Kidwell, MD (Principal Investigator); Andrew Laine (Primary Coordinator)

**Parkview Hospital**, Fort Wayne, IN, USA (2)

Rakesh Khatri, MD (Principal Investigator); Jeanne Carroll, RN BA CCRC (Primary Coordinator)

**University of Mississippi Medical Center**, Jackson, MS, USA (2)

Hartmut Uschmann, MD (Principal Investigator); As'ad Ehtisham, MD, (Principal Investigator, former, currently at Ehtisham Neurovascular Institute, ENVI, PLLC); Marcia Bankston (Primary Coordinator, former)

**The Ohio State University - Wexner Medical Center**, Columbus, OH, USA (2)

Michel Torbey, MD, MPH (Principal Investigator); Chad Miller, MD (Principal Investigator, former); Réza Behrouz, DO (Principal Investigator, former, currently Associate Professor at the University of Texas Health Science Center - San Antonio); Nirav Patel, MBBS, MPH; (Primary Coordinator); Leonard Basobas (Primary Coordinator, former)

**Brigham and Women's Hospital**, Boston, MA, USA (2)

Galen Henderson, MD (Principal Investigator); Sherry Chou, MD (Principal Investigator); Sarah Clark and Simone Renault (Primary Coordinators); Gabriela Santos, Sarah Suh, Kristina Lieu, and Ross Merkin (Primary Coordinators, former)

**Boston Medical Center**, Boston, MA, USA (2)

Joseph D. Burns, MD (Principal Investigator); Helena Lau, MSPH, RN (Primary Coordinator)

**Saint Louis University**, Saint Louis, MO, USA (2)

Salavador Cruz-Floes, MD (Principal Investigator); Eve M. Holzemer, DNP, ANP-BC ; Susan Eller, MA, RN, CCRC; Susan Brown, RN, CCRC (Primary coordinators); and JoAnn Filla-Taylor, BSN, RN, CCRC (Primary Coordinator, former)

**Hoag Memorial Hospital Presbyterian**, Newport Beach, CA, USA (2)

David Brown, MD (Principal Investigator); Laura Whitaker (Primary Coordinator)

**Changhua Christian Hospital**, Changhua, Taiwan (2)

Mu-Chien Sun, MD (Principal Investigator); Pi-Ju Hsiao (Primary Coordinator)

**University Hospital Leipzig**, Leipzig, Germany (2)

Dominik Michalski, MD (Principal Investigator, affiliation Department of Neurology, University of Leipzig); Carsten Hobohm, MD (Principal Investigator); Daniela Urban (Primary Coordinator)

**UC Davis Medical Center**, Sacramento, CA, USA (1)

Daniel K. Nishijima, MD (Principal Investigator); Glen C. Jickling, MD (Co-Principal Investigator); Laura Beth Jones (Primary Coordinator); Tirath Sanghera, CCRC (Primary Coordinator, former)

**University of Florida Gainesville**, Gainesville, FL, USA (1)

Anna Khanna, MD (Principal Investigator); Vishnumurthy Shushrutha Hedna, MD (Principal Investigator, former, now at University of New Mexico); Rosie Kizza, RN (Primary Study Coordinator)

**Aurora St. Luke's Medical Center**, Milwaukee, WI, USA (1)

Elizabeth Marriott, MD (Principal Investigator); Linda Yanny, RN, BSN, CCRC (Primary Coordinator)

**Seton Medical Center Austin**, Austin, TX, USA (1)

Jefferson T. Miley, MD (Principal Investigator); Laura LaChance, MA, CCRP (Primary Coordinator); Alison M. von Eberstein, PhD, RN, BSN (Primary Coordinator, former, currently at Florida State University School of Information)

**UPMC Mercy Hospital**, Pittsburgh, PA, USA (1)

Bradley J. Molyneaux, MD, PhD; Clifton W. Callaway, MD, PhD; and Jon C. Rittenberger, MD (Principal Investigators); Sara Difiore (Primary Coordinator)

**Emory University Hospital**, Atlanta, GA, USA (1)

Gustavo Pradilla, MD (Principal Investigator); Alex J. Hall, MS, RN (Primary Coordinator); and Michael P. Lunney, MPH, NRP (Primary Coordinator, former)

**Santa Clara Valley Medical Center**, San Jose, CA, USA (1)

Marco Lee, MD, PhD, Dept. of Neurosurgery, Stanford University (Principal Investigator); Anita Visweswaran (Primary Coordinator)

**William Beaumont Hospital-Royal Oak**, Royal Oak, MI, USA (1)

Robert Swor, DO (Principal Investigator); Mara Branoff, RN, BSN (Primary Coordinator/Research Nurse Clinician)

**Akron General Hospital**, Akron, OH, USA (1)

James M. Gebel, MD (Principal Investigator); Debra Hudock, MSN (Primary Coordinator)

**Saint Luke's Marion Bloch Neuroscience Institute**, Kansas City, KS, USA (1) Darren Lovick, MD (Principal Investigator); Bridget Brion (Primary Coordinator)

**United Health Services Hospitals, Inc. – Wilson Medical Center**, Johnson City, NY, USA (1)

Yahia M. Lodi, MD (Principal Investigator); Varun Reddy, MD (Investigator); Terri Peters (Primary Coordinator)

**Vanderbilt Stroke Center**, Nashville, TN, USA (1)

Michael T. Froehler, MD, PhD (Principal Investigator); Howard S. Kirshner, MD (Investigator); Matthew M. Warrick (Primary Coordinator)

**Oklahoma University Health Sciences Center (OUHSC)**, Oklahoma City, OK, USA (1)

Evgeny Sidorov, MD, PhD (Principal Investigator); Akram Shhadeh, MD (Principal Investigator, former); Bradley Hightower (Primary Coordinator)

**Kawasaki Medical School**, Okayama, Japan (1)

Kazumi Kimura, MD, PhD (Principal Investigator, former, now at Nippon Medical School); Kensaku Shibasaki (Primary Coordinator)

**Taipei Veterans Hospital**, Taipei, Taiwan (1)

Chang-Ming Chern, MD (Principal Investigator); Chia-Hui Lin and Chia-Wei Lin Hsu (Primary Coordinators)

**Department of Neurology at Klinikum Frankfurt Hoechst**, Frankfurt, Germany (1)

Thorsten Steiner, MD, MME (Principal Investigator); Corina Epple, MD; Mari-Carmen Lichti, MD; Johannes Trabert; and Anna Katharina Flügel, MD, Department of Internal Medicine, Frankfurt University Hospital (Investigators); Sabrina J. Ritter (Primary Coordinator)

**Charite Universitätsmedizin Berlin, Berlin, Germany (1)**



**eFigure.** Flow Diagram of the ATACH-II Trial

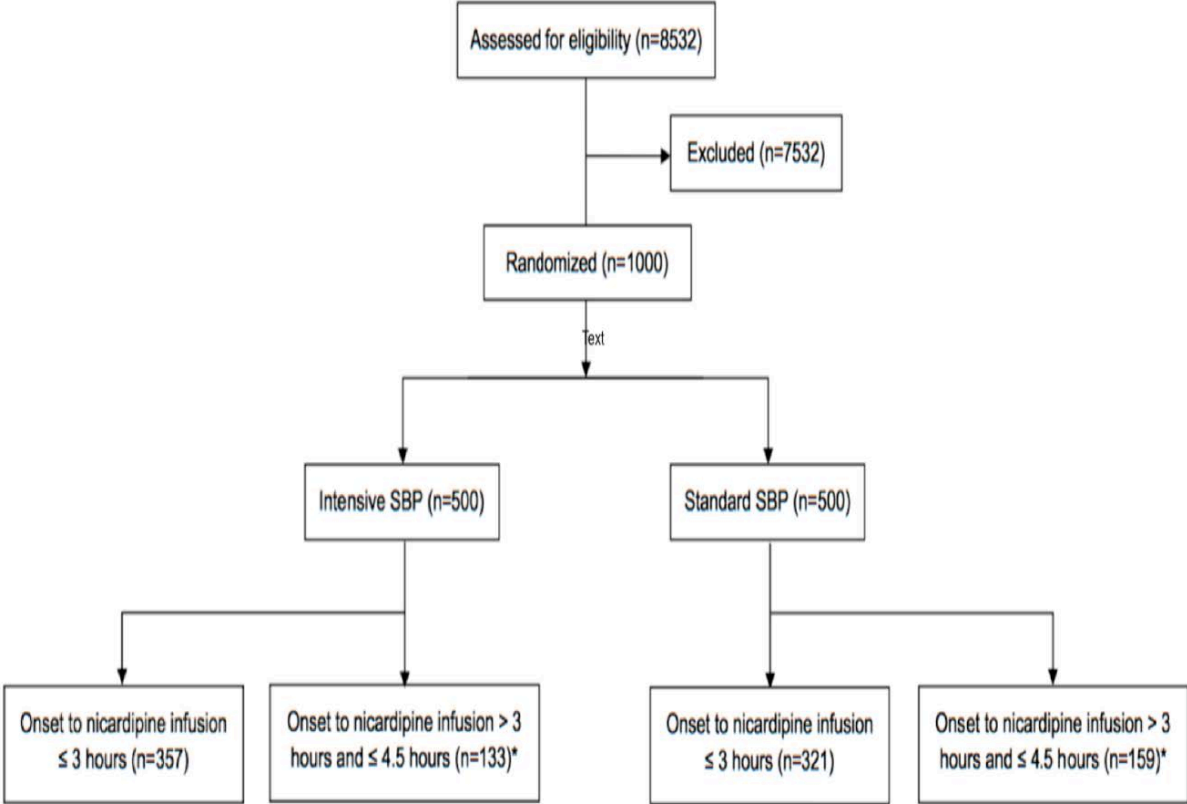

\*10 subjects in the intensive group and 20 in the standard group have time from onset to nicardipine infusion greater than 4.5 hours

**eTable.** Comparison of Baseline Characteristics and Neuroimaging Findings for Subjects Included in CMB Analysis and the Rest of the Subjects From ATACH-2

|                                                                                             | CMB Analysis<br>(n = 167) | Excluded<br>(n = 833) | p-value |
|---------------------------------------------------------------------------------------------|---------------------------|-----------------------|---------|
| <b>Demographics</b>                                                                         |                           |                       |         |
| Male – no. (%)                                                                              | 108 (59.3)                | 512 (62.6)            | 0.41    |
| Age, years – mean (SD)                                                                      | 61.9 (13.2)               | 61.9 (13.1)           | 0.94    |
| Race – no. (%)                                                                              |                           |                       | 0.35    |
| White                                                                                       | 52 (31.1)                 | 235 (28.2)            |         |
| Black                                                                                       | 27 (16.2)                 | 104 (12.5)            |         |
| Asian                                                                                       | 84 (50.3)                 | 478 (57.4)            |         |
| Other                                                                                       | 4 (2.4)                   | 16 (1.9)              |         |
| Smoking - no./total no. (%)                                                                 | 71/154 (46.1)             | 368/760 (48.4)        | 0.60    |
| Cocaine use – no./total no. (%)                                                             | 10/151 (6.6)              | 29/743 (3.9)          | 0.14    |
| Hypertension – no./total no. (%)                                                            | 125/165 (75.8)            | 668/808 (82.7)        | 0.04    |
| SBP at initial presentation – mean (SD)                                                     | 198.4 (27.2)              | 201.0 (26.9)          | 0.26    |
| DBP at initial presentation – mean (SD)                                                     | 110.9 (20.4)              | 111.0 (20.7)          | 0.96    |
| Prior stroke/TIA – no. (%)                                                                  | 26/167 (15.6)             | 138/827 (16.7)        | 0.72    |
| Congestive heart failure – no. (%)                                                          | 7/167 (4.2)               | 30/823 (3.7)          | 0.73    |
| Atrial fibrillation – no. (%)                                                               | 2/167 (1.2)               | 34/823 (4.1)          | 0.06    |
| Diabetes mellitus – no./total no. (%)                                                       | 31/165 (18.8)             | 154/816 (18.9)        | 0.98    |
| Ischemic heart disease – no. (%) [previous CABG, MI within 3 months, angina pectoris, PTCA] | 4/167 (2.4)               | 40/823 (4.9)          | 0.16    |
| Hyperlipidemia – no./total no. (%)                                                          | 45/162 (27.78)            | 196/778 (25.2)        | 0.49    |
| Peripheral vascular disease – no./total no. (%)                                             | 3/166 (1.8)               | 19/822 (2.3)          | 1.00    |
| <b>Laboratory</b>                                                                           |                           |                       |         |
| Total white blood cell count – median (IQR)                                                 | 7.3 (5.7, 9.0)            | 7.6 (6.1, 9.7)        | 0.03    |
| Platelet count - mean (SD)                                                                  | 214.0 (54.6)              | 222.9 (64.2)          | 0.07    |
| Hemoglobin - mean (SD)                                                                      | 14.3 (1.6)                | 14.2 (1.8)            | 0.91    |
| Hematocrit - mean (SD)                                                                      | 42.3 (4.6)                | 41.9 (4.8)            | 0.30    |
| Serum glucose – median (IQR)                                                                | 120 (105, 145)            | 122 (106, 151)        | 0.38    |
| Serum creatinine – median (IQR)                                                             | 0.9 (0.7, 1.12)           | 0.9 (0.7, 1.1)        | 0.34    |
| Creatinine > 1.5 – no. (%)                                                                  | 18 (10.8)                 | 73 (8.8)              | 0.41    |
| <b>Neurological scales</b>                                                                  |                           |                       |         |
| Baseline GCS – no. (%)                                                                      |                           |                       | 0.02    |
| 3-11                                                                                        | 18 (9.9)                  | 129 (15.8)            |         |
| 12-14                                                                                       | 46 (25.3)                 | 248 (30.3)            |         |
| 15                                                                                          | 118 (64.8)                | 441 (53.9)            |         |
| Baseline NIHSS – median (IQR)                                                               | 9 (5, 15)                 | 11 (7, 16)            | 0.005   |
| <b>Treatment allocation:</b>                                                                |                           |                       |         |
| Intensive blood pressure target – no. (%)                                                   | 93 (51.1)                 | 407 (49.8)            | 0.74    |

**Abbreviations:** CABG, coronary artery bypass grafting; DBP, diastolic blood pressure; DWIHL, diffusion weighted imaging hyperintense lesions; GCS, glasgow coma scale; IQR, interquartile range; MI, myocardial infarction; NIHSS, national institutes of health stroke scale; SBP, systolic blood pressure; SD, standard deviation; TIA, transient ischemic attack.
